# Supplementary material for: Chickpeas’ and Lentils’ Soaking and Cooking Wastewaters Repurposed for Growing Lactic Acid Bacteria
Source: MDPI journal article supplement (doi:10.3390/foods12122324), 2023-06-09
Supplement: s1 [file s1]

## Supplementary Material S2

Composition of the de Man, Rogosa, and Sharpe medium prepared without glucose.

| Component                       | Concentration | Brand                  |
|---------------------------------|---------------|------------------------|
| Peptone                         | 20 g/L        | Biokar (France)        |
| Yeast extract                   | 5 g/L         | Oxoid (United Kingdom) |
| Dipotassium hydrogen phosphate  | 2 g/L         | J. T. Baker (USA)      |
| Sodium acetate trihydrate       | 5 g/L         | Anedra (Argentina)     |
| Triammonium citrate             | 2 g/L         | Mallinckrodt (USA)     |
| Magnesium sulphate heptahydrate | 0.2 g/L       | ICN Biomedicals (USA)  |
| Manganese sulphate tetrahydrate | 0.05 g/L      | Sigma (USA)            |
| Tween 80                        | 1 mL for 1 L  | Biopack (Argentina)    |
